# Supplementary material for: Identification and expression analysis of maize NF-YA subunit genes
Source: PeerJ. 2022 Nov 7;10:e14306. doi: 10.7717/peerj.14306 (PMC9648346; doi:10.7717/peerj.14306)
Supplement: Supplemental Information 8 [file peerj-10-14306-s008.xlsx]

## Sheet: SA
Sequence numbe	Gene	Processing time	Relative expression	Variance
1	NFYA01	0h	1	0.19799
		3h	1.65099	0.319479
		9h	1.19472	0.299592
		24h	0.845768	0.326292
2	NFYA02	0h	1	0.0309121
		3h	2.10916	0.0694422
		9h	0.915945	0.00816497
		24h	0.462759	0.0784573
3	NFYA03	0h	1	0.115758
		3h	1.07923	0.0903081
		9h	1.52274	0.252499
		24h	0.814131	0.20854
4	NFYA04	0h	1	0.163911
		3h	0.249711	0.16
		9h	0.195016	0.168193
		24h	0.301104	0.06
5	NFYA05	0h	1	0.264197
		3h	0.954842	0.373928
		9h	0.92445	0.0374166
		24h	1.11214	0.0454606
6	NFYA06	0h	1	0.219241
		3h	0.740549	0.0860233
		9h	0.793701	0.0616441
		24h	0.632878	0.299592
7	NFYA08	0h	1	0.0408248
		3h	1.39797	0.054365
		9h	1.6358	0.0857645
		24h	1.5874	0.054365
8	NFYA09	0h	1	0.0249444
		3h	0.557354	0.191311
		9h	1.76541	0.143372
		24h	1.2086	0.147045
9	NFYA10	0h	1	0.0758654
		3h	1.12246	0.0329983
		9h	0.336808	0.148549
		24h	0.752623	0.0449691
10	NFYA11	0h	1	0.148847
		3h	1.35974	0.188326
		9h	2.06337	0.115
		24h	1.58008	0.10274
11	NFYA12	0h	1	0.277649
		3h	0.374577	0.0249444
		9h	0.48858	0.17932
		24h	0.874583	0.134907
12	NFYA13	0h	1	0.282882
		3h	1.14076	0.146591
		9h	3.00355	0.224846
		24h	1.2086	0.0697615
13	NFYA14	0h	1	0.282174
		3h	1.58374	0.0725718
		9h	1.9816	0.191543
		24h	1.35347	0.0498888
14	NFYA15	0h	1	0.005
		3h	8.51496	0.095
		9h	5.73582	0.105
		24h	5.61778	0.095
15	NFYA16	0h	1	0.29
		3h	2.15099	0.095
		9h	3.2154	0.185
		24h	7.42985	0.0837987

## Sheet: MeJA
Sequence numbe	Gene	Processing time	Relative expression	Variance
1	NFYA01	0h	1	0.0801388
		3h	1.65864	0.0974109
		9h	1.46071	0.00942809
		24h	0.527289	0.3332
2	NFYA02	0h	1	0.112645
		3h	1.89212	0.0834
		9h	0.664343	0.0648074
		24h	0.537126	0.054365
3	NFYA03	0h	1	0.062361
		3h	1.44393	0.0784573
		9h	0.933033	0.21746
		24h	1.41095	0.106145
4	NFYA04	0h	1	0.31
		3h	3.3058	0.135
		9h	0.498846	0.02
		24h	0.304251	0.03
5	NFYA05	0h	1	0.243903
		3h	0.66281	0.172111
		9h	0.552227	0.149741
		24h	0.689362	0.341207
6	NFYA06	0h	1	0.187853
		3h	2.43964	0.236972
		9h	0.73884	0.0492161
		24h	1.3692	0.0679869
7	NFYA08	0h	1	0.0449691
		3h	1.72907	0.233429
		9h	0.886791	0.1
		24h	1.29834	0.323213
8	NFYA09	0h	1	0.38635
		3h	1.90088	0.17932
		9h	0.870551	0.09
		24h	0.435275	0.13
9	NFYA10	0h	1	0.125
		3h	1.4257	0.148174
		9h	0.198654	0.154344
		24h	0.44803	0.285
10	NFYA11	0h	1	0.36
		3h	0.72951	0.055
		9h	0.128218	0.0659966
		24h	0.0788361	0.015
11	NFYA12	0h	1	0.0784573
		3h	1.45397	0.19754
		9h	0.521233	0.29937
		24h	0.471937	0.408928
12	NFYA13	0h	1	0.21
		3h	3.78423	0.23
		9h	1.5874	0.116714
		24h	0.52003	0.131993
13	NFYA14	0h	1	0.117284
		3h	0.513463	0.185
		9h	0.874583	0.23214
		24h	0.713672	0.279404
14	NFYA15	0h	1	0.0816497
		3h	2.23457	0.0294392
		9h	0.658231	0.0309121
		24h	0.548412	0.0449691
15	NFYA16	0h	1	0.0424264
		3h	1.63959	0.02
		9h	0.864537	0.0979796
		24h	0.933033	0.131403

## Sheet: nfya01
Sequence numbe	Gene	Plant	Relative expression	Variance
1	ZmNFYA01	B73	1	0.215065
		nfya01-1	0.104991	0.0679401
		nfya01-2	0.257921	0.124989

## Sheet: nfya06
Sequence numbe	Gene	Plant	Relative expression	Variance
1	ZmNFYA06	B73	1	0.16
		nfya06-1	0.111878	0.065
		nfya06-2	0.130459	0.07
