# Supplementary material for: Identification and expression analysis of maize NF-YA subunit genes
Source: PeerJ. 2022 Nov 7;10:e14306. doi: 10.7717/peerj.14306 (PMC9648346; doi:10.7717/peerj.14306)
Supplement: Supplemental Information 9 [file peerj-10-14306-s009.xlsx]

## Sheet: nfya01
Sequence numbe	Gene	Plant	Relative expression	Variance
1	ZmPR1	B73	1	0.251826
		nfya01-1	0.229074	0.134021
		nfya01-2	0.302819	0.0269943
2	ZmPR2	B73	1	0.142403
		nfya01-1	0.336358	0.0275608
		nfya01-2	0.0370136	0.00741252
3	ZmPR3	B73	1	0.15556
		nfya01-1	0.214104	0.0558032
		nfya01-2	0.0227195	0.00777416
4	ZmPR4	B73	1	0.111314
		nfya01-1	2.1724	0.178977
		nfya01-2	1.89437	0.439605
5	ZmPR5	B73	1	0.0408623
		nfya01-1	0.339723	0.035477
		nfya01-2	0.0698743	0.00461433
6	ZmPR6	B73	1	0.0833597
		nfya01-1	0.393409	0.158677
		nfya01-2	0.190032	0.0176158
7	ZmPR7	B73	1	0.100575
		nfya01-1	2.3685	0.0391825
		nfya01-2	1.79311	0.264698
10	ZmPR10	B73	1	0.0284118
		nfya01-1	2.11567	0.103271
		nfya01-2	1.85717	0.247034

## Sheet: nfya06
Sequence numbe	Gene	Plant	Relative expression	Variance
1	ZmPR1	B73	1	0.251826
		nfya06-1	0.30893	0.0583946
		nfya06-2	0.189931	0.0355526
2	ZmPR2	B73	1	0.142403
		nfya06-1	0.46975	0.121415
		nfya06-2	0.399064	0.117063
3	ZmPR3	B73	1	0.15556
		nfya06-1	0.406516	0.0977287
		nfya06-2	0.414433	0.147379
4	ZmPR4	B73	1	0.111314
		nfya06-1	1.60814	0.108931
		nfya06-2	2.04218	0.329293
5	ZmPR5	B73	1	0.0408623
		nfya06-1	0.644003	0.147832
		nfya06-2	0.658327	0.132552
6	ZmPR6	B73	1	0.0833597
		nfya06-1	0.467672	0.10238
		nfya06-2	0.494349	0.182244
7	ZmPR7	B73	1	0.100575
		nfya06-1	1.76774	0.159828
		nfya06-2	1.69596	0.0467472
10	ZmPR10	B73	1	0.0284118
		nfya06-1	1.93651	0.0602462
		nfya06-2	1.55568	0.256511
